# Supplementary material
Source: PubMed Central journal article supplement (PMC8636169)
Supplement: mmc1.pdf [file mmc1.pdf]

YMTHE, Volume 29

## Supplemental Information

**METTL1/WDR4-mediated m<sup>7</sup>G tRNA**

**modifications and m<sup>7</sup>G codon usage promote mRNA**

**translation and lung cancer progression**

**Jieyi Ma, Hui Han, Ying Huang, Chunlong Yang, Siyi Zheng, Tiancai Cai, Jiong Bi, Xiaohui Huang, Ruiming Liu, Libin Huang, Yifeng Luo, Wen Li, and Shuibin Lin**

**Supplemental information**  
**Supplemental figures and legends**

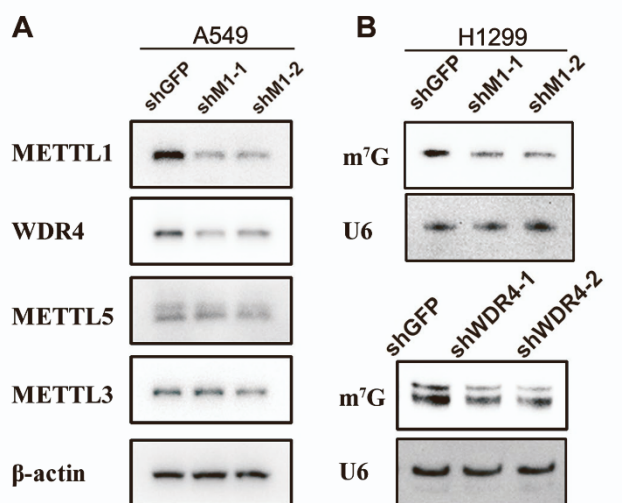

**Figure S1.** (A) Knockdown of METTL1 reduces the expression of WDR4 but not other methyltransferases including METTL3 and METTL5. (B) Knockdown of METTL1 or WDR4 reduced the m<sup>7</sup>G modification of tRNAs in H1299 cells.

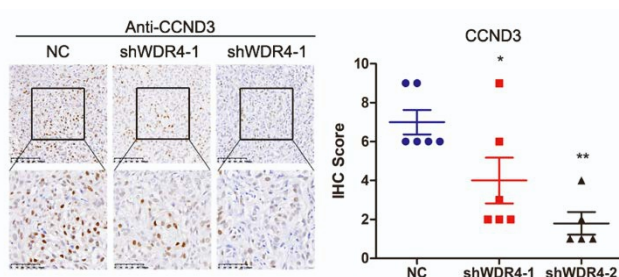

**Figure S2.** IHC confirmed the decreased expression of the identified TE down gene CCND3 in WDR4 depleted xenograft tumors sections. (One-way ANOVA, Student's t test, \* p < 0.05, \*\*\* p < 0.001, compared to shGFP group).

**Table S1.** Oligonucleotides sequences

| <b>siRNA and shRNA</b>               |                                                                |
|--------------------------------------|----------------------------------------------------------------|
| shMETTL1-1                           | AAATGAGTGCACATCCAGTCG                                          |
| shMETTL1-2                           | TTTCTTATCCTTTGGGTCATC                                          |
| shWDR4-1                             | AAGAGGCTGTCATCATCACTG                                          |
| shWDR4-2                             | TCTAACAGCATAGACAGGTGC                                          |
| siMETTL1-1                           | GATGACCCAAAGGATAAGAAA                                          |
| siMETTL1-2                           | GGACATCTAGGCACCTCAA                                            |
| <b>Primers for Real-time qRT-PCR</b> |                                                                |
| β-actin primer                       | Forward: TTCTACAATGAGCTGCGTGTG<br>Reverse: GGGGTGTTGAAGGTCTCAA |
| CCND3 primer                         | Forward: CCTGGGGGCTCTCATGTTTT<br>Reverse: AGGGGCTCCAAAGTACTGA  |
| CCNE1 primer                         | Forward: ACTCAACGTGCAAGCCTCG<br>Reverse: GCTCAAGAAAGTGCTGATCCC |
| <b>Northern blot probes</b>          |                                                                |
| tRNA-Pro-AGG                         | CTCGTCCGGGATTTGAACCC                                           |
| tRNA-Val-AAC                         | TGTTTCCGCCCGTTTCGAA                                            |
| tRNA-GlnCTG                          | CAGAGTGCTAACCATTACACCATGGAACC                                  |
| U6 snoRNA                            | TGGAACGCTTCACGAATTTG                                           |

**Table S2. RNC seq-TE down gene list**

**Table S3. RNC seq-TE up gene list**

**Table S4. RNC mRNA seq**
